# Supplementary material
Source: PubMed Central journal article supplement (PMC5071554)
Supplement: mmc1.pdf [file mmc1.pdf]

**Biophysical Journal, Volume 111**

**Supplemental Information**

**Nanomechanics of Fluorescent DNA Dyes on DNA Investigated by Magnetic Tweezers**

**Ying Wang, Andy Sischka, Volker Walhorn, Katja Tönsing, and Dario Anselmetti**

## Supporting Information

Fig 1.

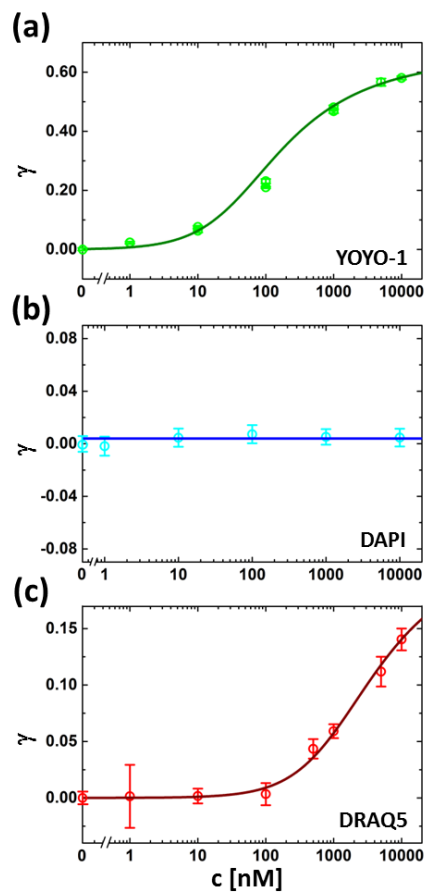

Fractional elongation  $\gamma(c)$  of **(a)** YOYO-1, **(b)** DAPI and **(c)** DRAQ5. Very same data as presented in the paper in Fig. 3, yet in a semi-logarithmic representation.

Fig 2.

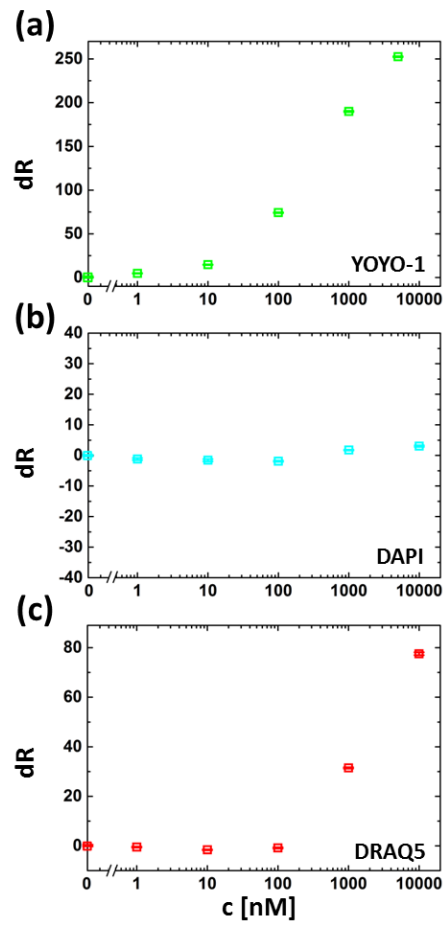

Superspiralization as a function of dye concentration of **(a)** YOYO-1, **(b)** DAPI and **(c)** DRAQ5.  
 $dR = R(c) - R_0$ .

**Table 1.**

| coefficient of determination $R^2$ for | YOYO-1  | DAPI    | DRAQ5   |
|----------------------------------------|---------|---------|---------|
| WLC-fitting                            | 0.96670 | 0.93838 | 0.95560 |
| Mc Ghee-von Hippel fitting             | 0.98995 | —       | 0.99763 |
| dR-dL (linear fitting)                 | 0.93296 | —       | 0.99417 |

Fit quality by means of the coefficient of determination.
